# Supplementary material
Source: PubMed Central journal article supplement (PMC373520)

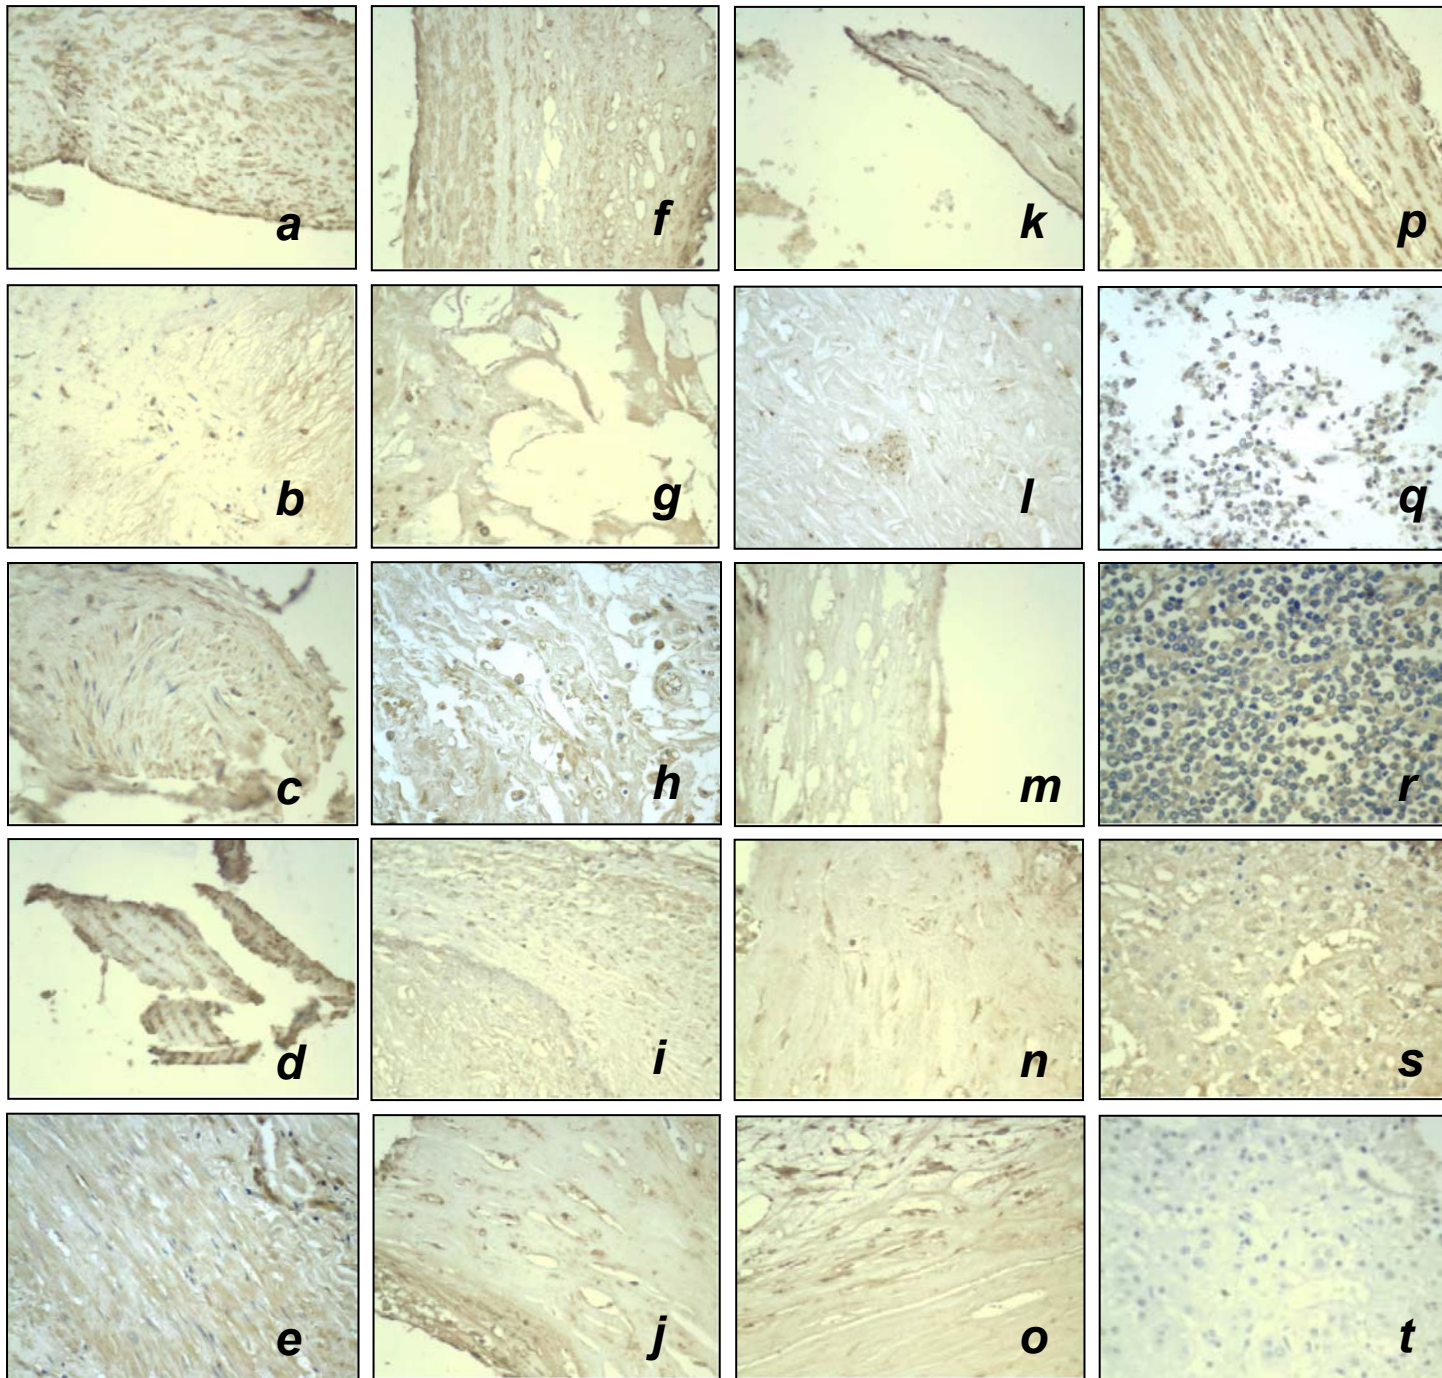

Supplement: pnas_0400046101_2.pdf [file pnas_0400046101_2.pdf]

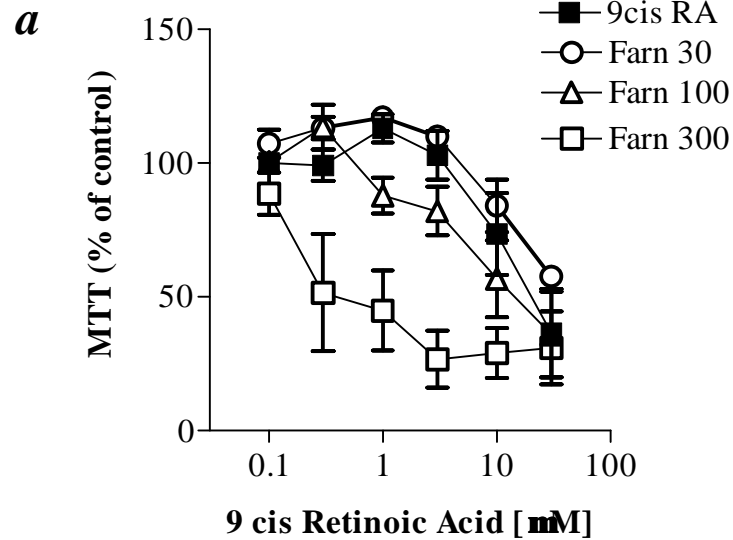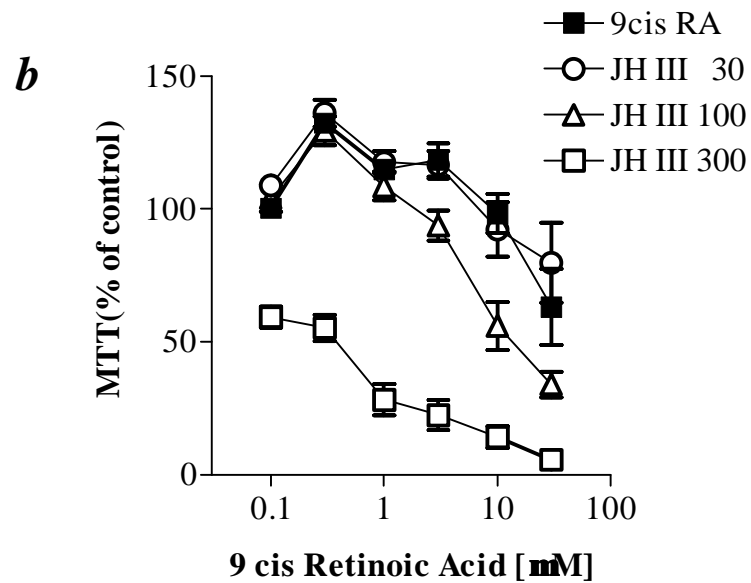

Supplement: pnas_0400046101_4.pdf [file pnas_0400046101_4.pdf]
